# Supplementary material
Source: MDPI journal article supplement (https://www.mdpi.com/2218-0532/90/3/55)
Supplement: s1 [file s1]

# LC-HRMS-Based Profiling: Antibacterial and Lipase Inhibitory Activities of Some Medicinal Plants for the Remedy of Obesity

Basanta Kumar Sapkota, Karan Khadayat, Babita Aryal, Jyoti Bashyal, Shankar Jaisi and Niranjana Parajuli \*

Biological Chemistry Lab, Central Department of Chemistry, Tribhuvan University, Kirtipur, Kathmandu 44618, Nepal

\* Correspondence: niranjana.parajuli@cdc.tu.edu.np; Tel.: +977-1-4332034

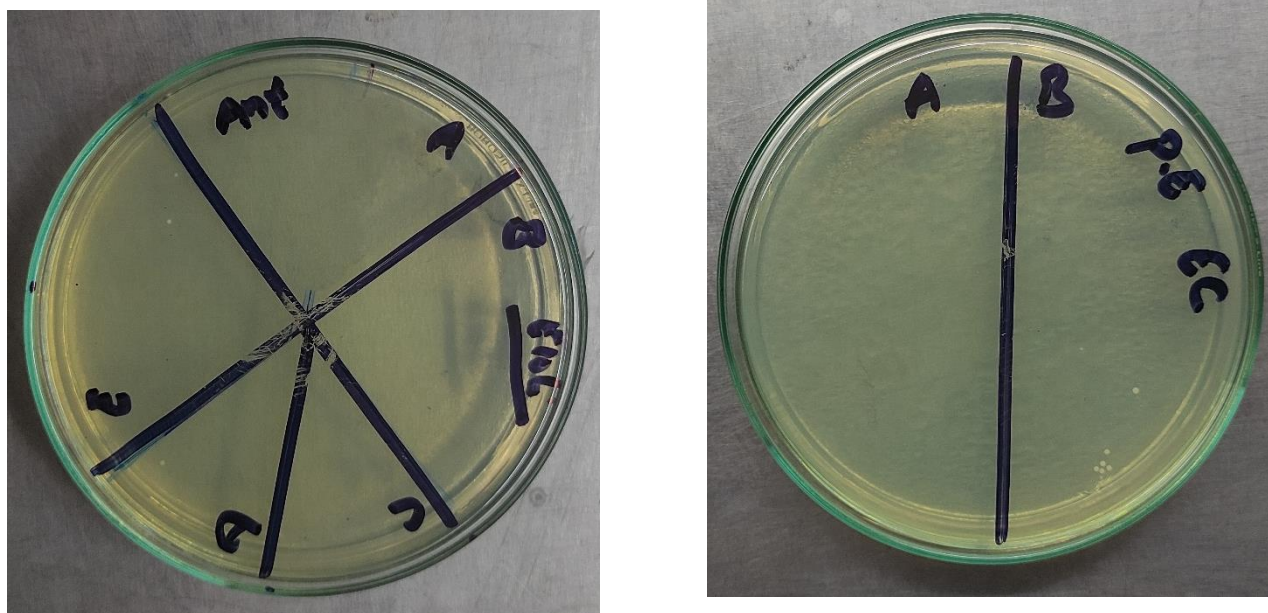

**Figure S1** MBC of antibiotic and *P. emblica* against *E.coli*

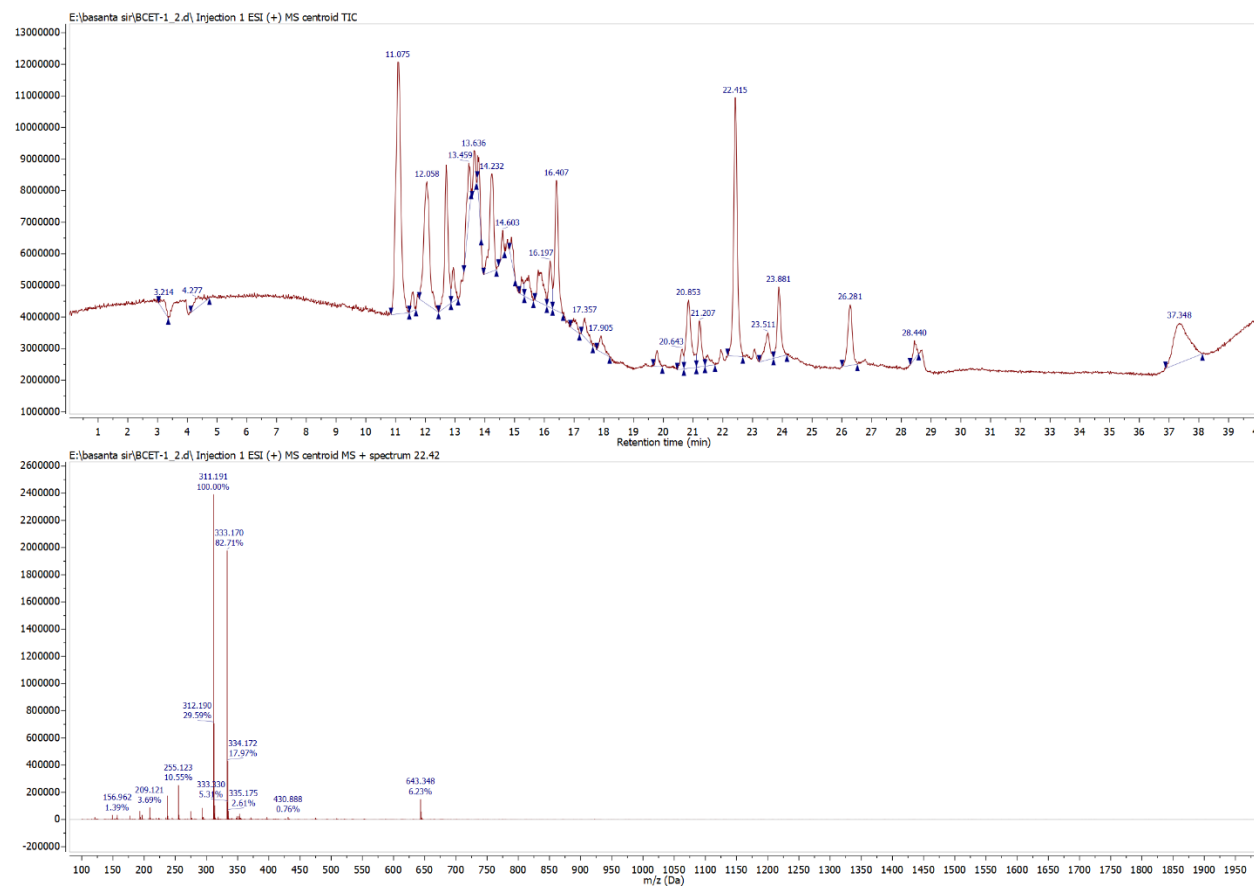

**Figure S2** Mass spectrum of *Bergenia ciliata*

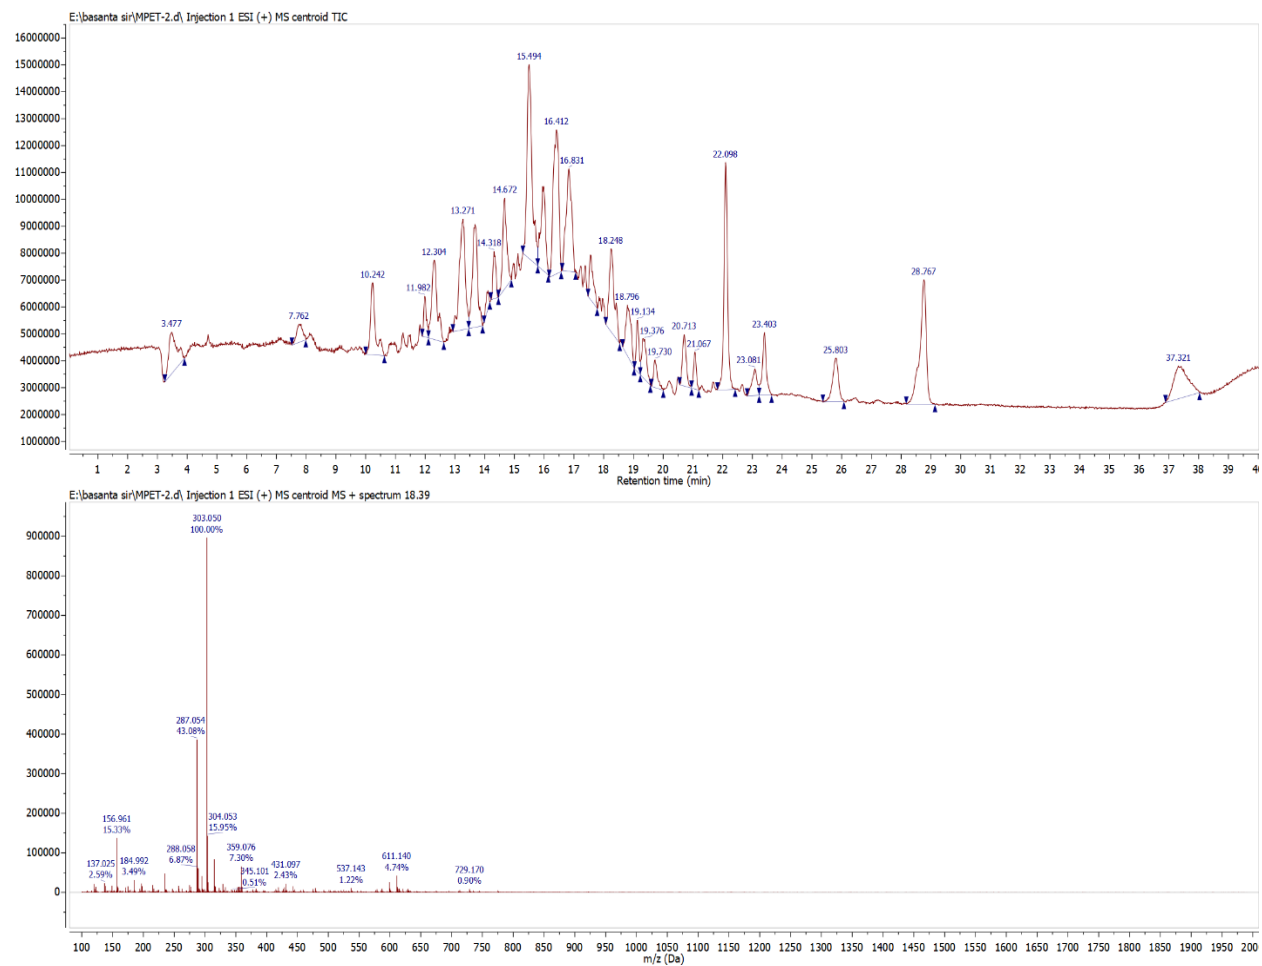**Figure S3** Mass spectrum of *Mimosa pudica*

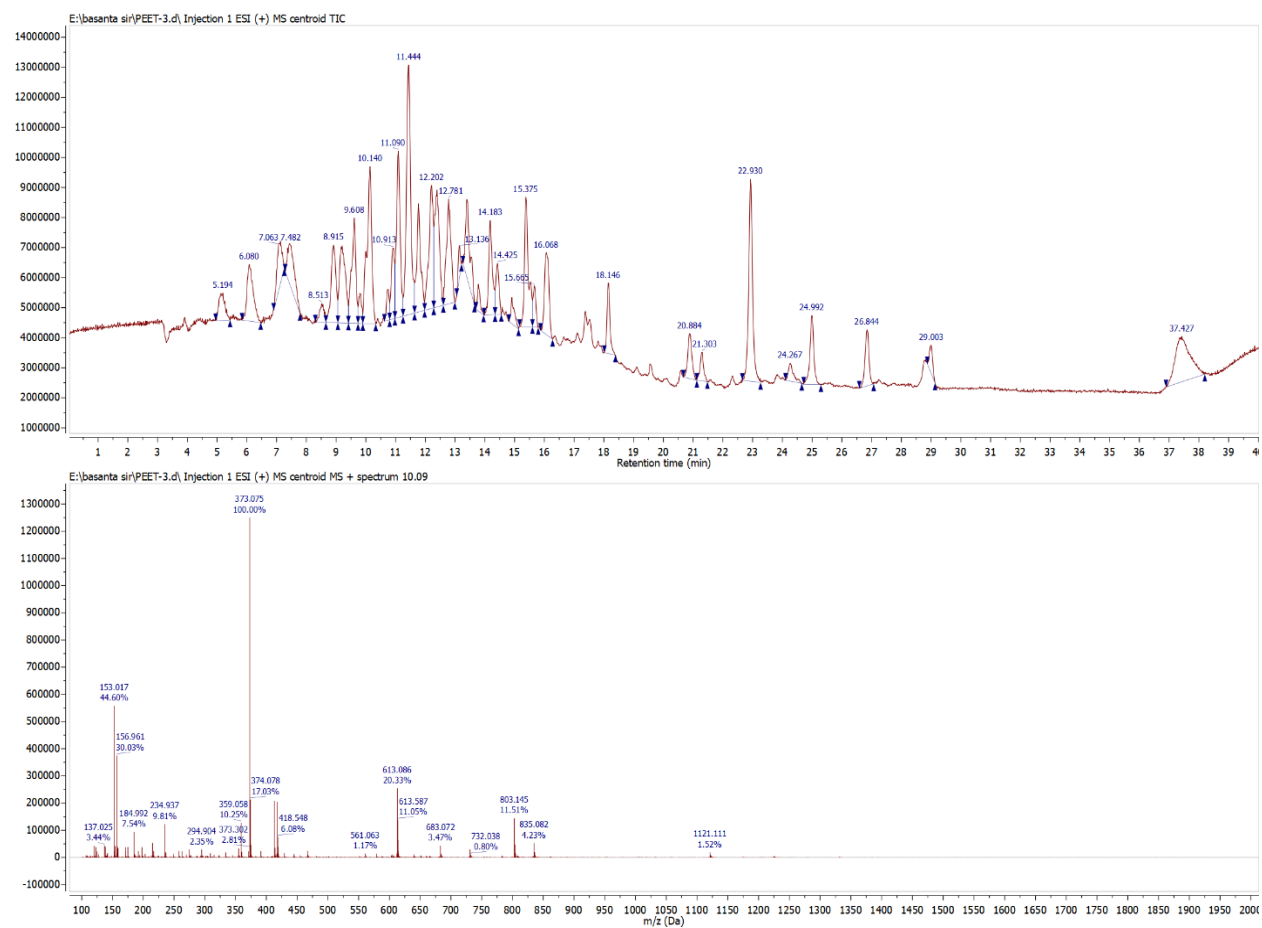

**Figure S4** Mass spectrum of *Phyllanthus emblica*

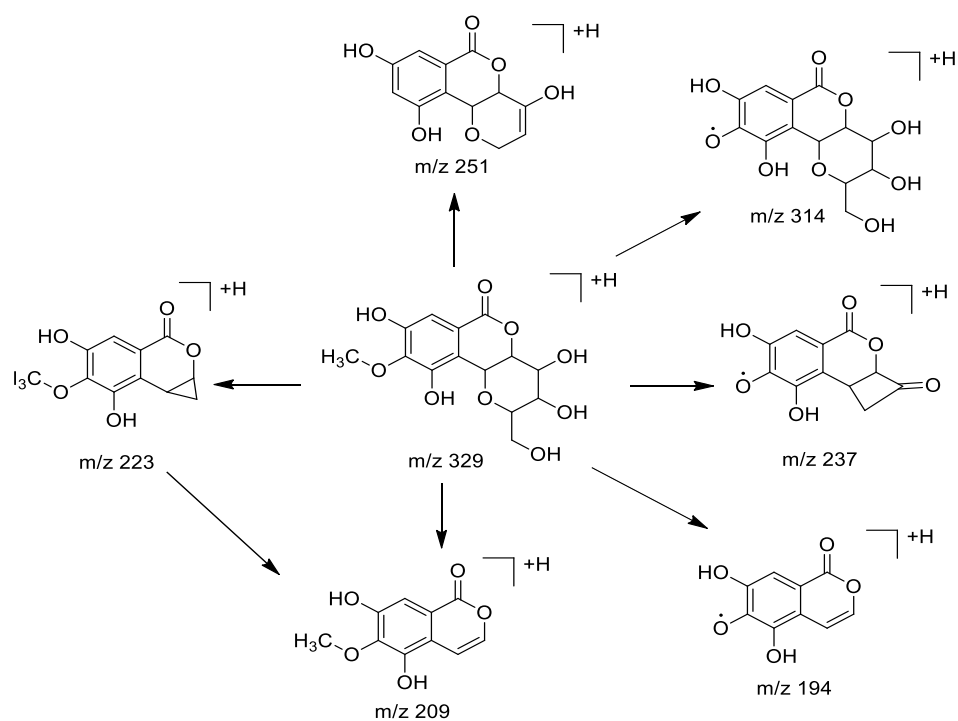

**Figure S5** Fragmentation pattern of bergenin

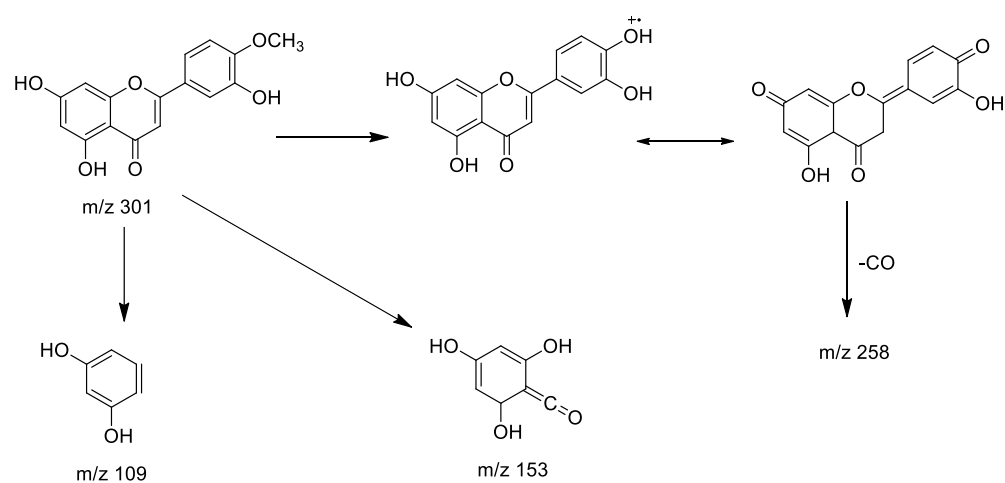

**Figure S6** Fragmentation pattern of diosmetin

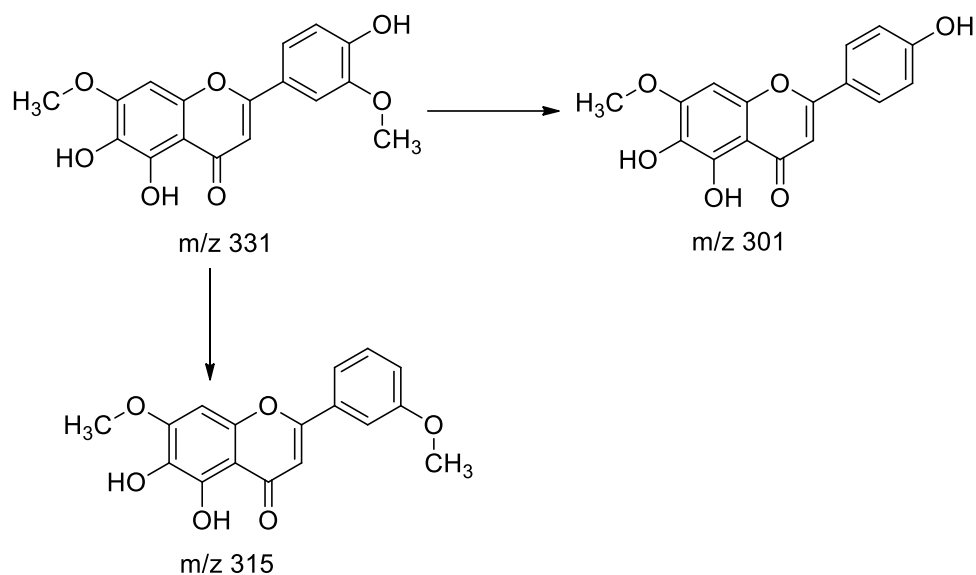

**Figure S7** Fragmentation pattern of trihydroxy-dimethoxyflavone

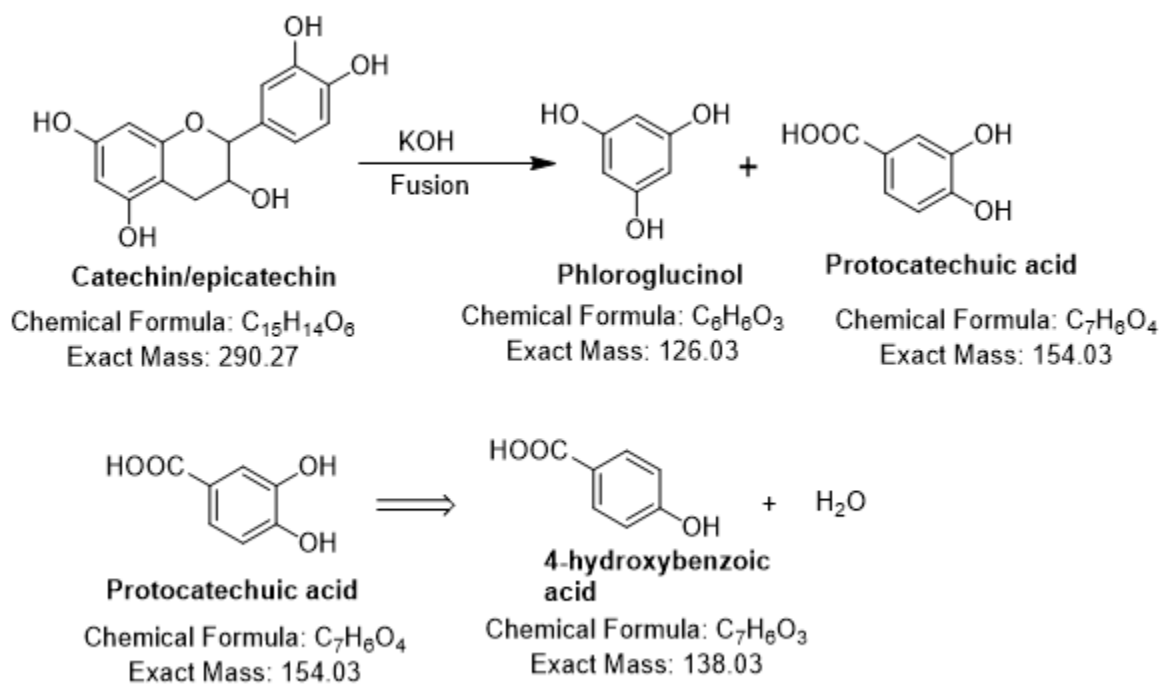

**Figure S8** Fragmentation pattern of catechin/epicatechin.

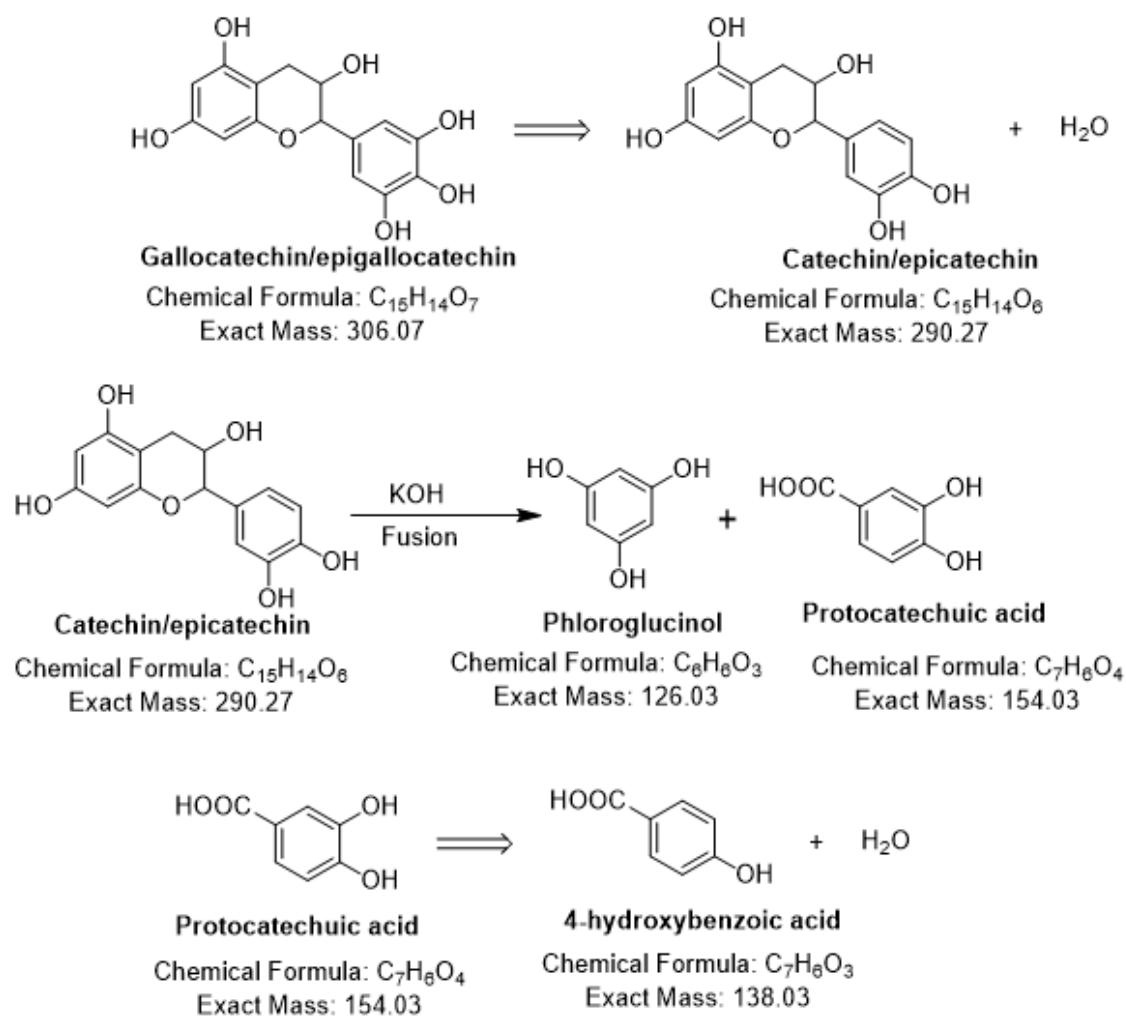

**Figure S9** Fragmentation pattern of gallocatechin/epigallocatechin

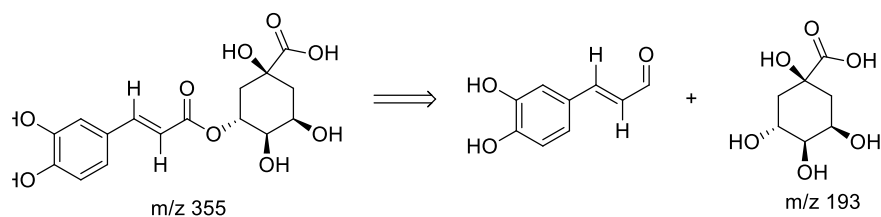

**Figure S10** Fragmentation pattern of chlorogenic acid

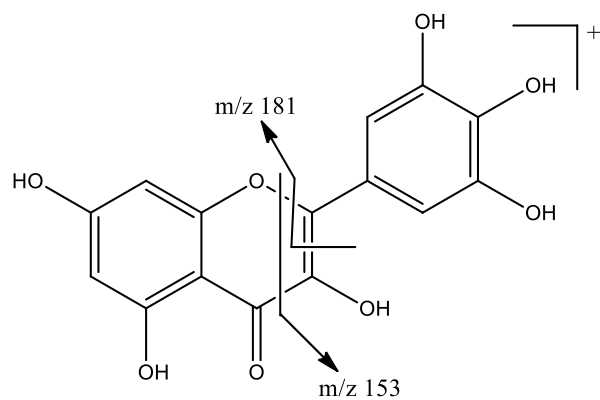

**Figure S11** Fragmentation pattern of myricetin

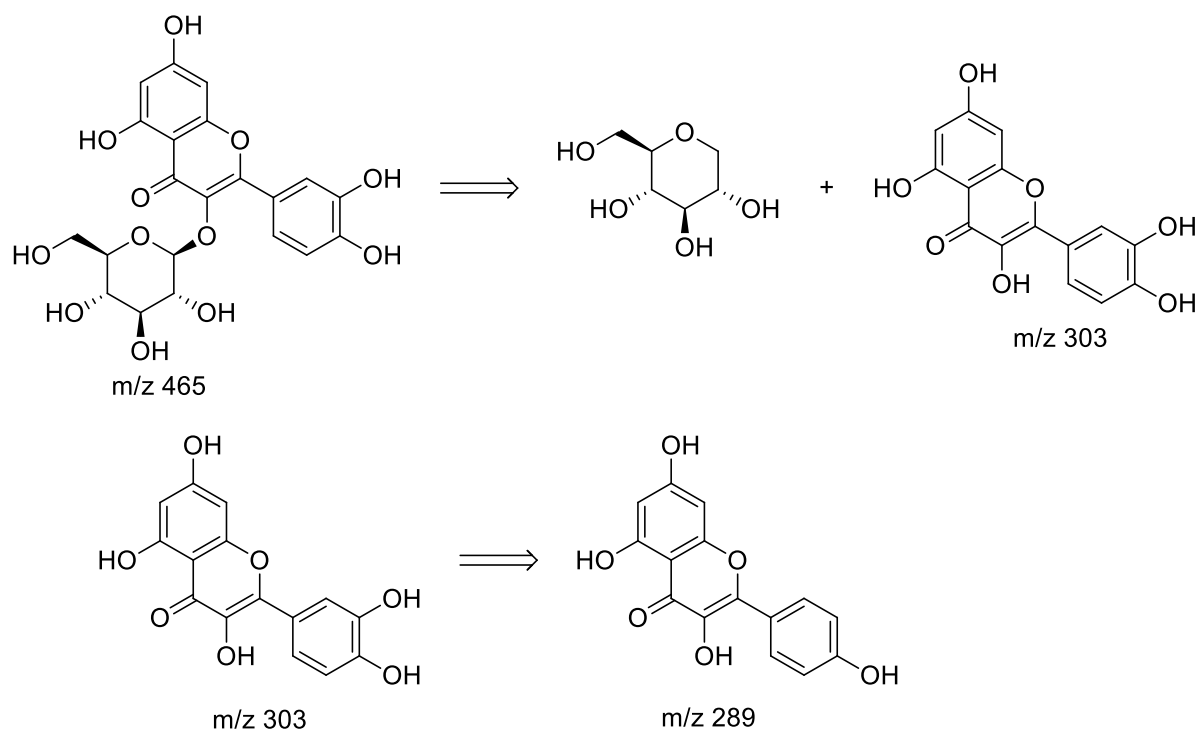

**Figure S12** Fragmentation pattern of isoquercetin



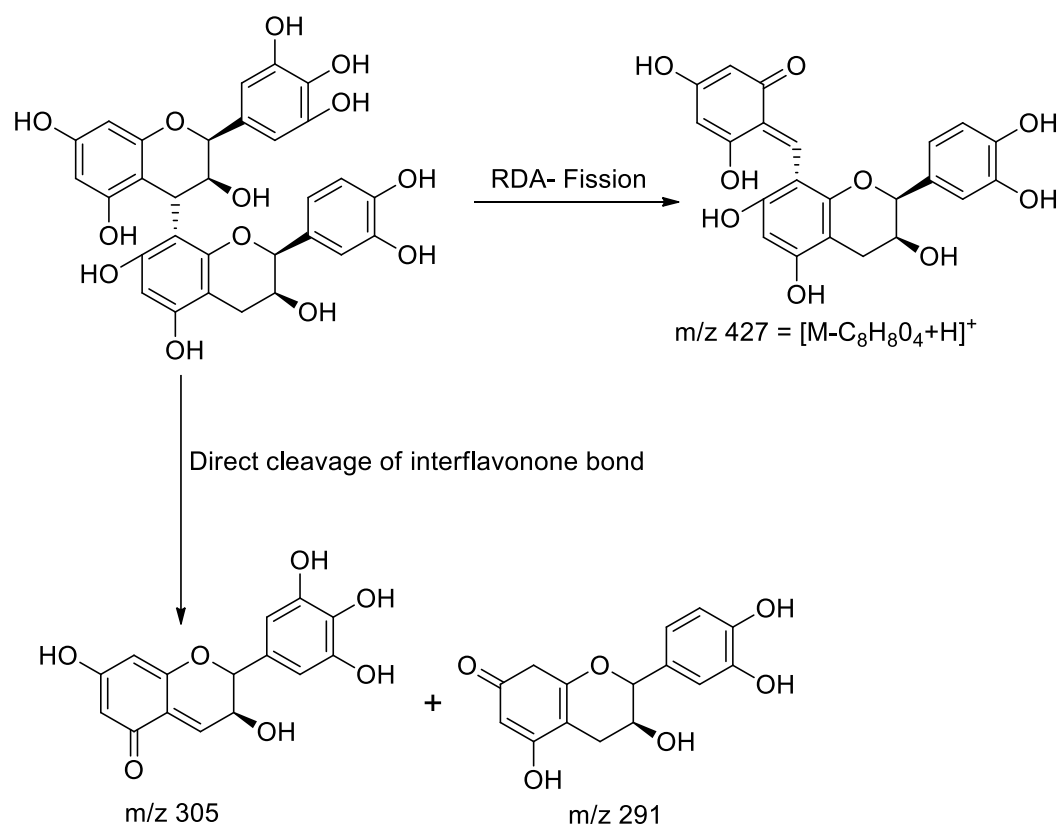

**Figure S13** Fragmentation pattern of prodelfinidin B3

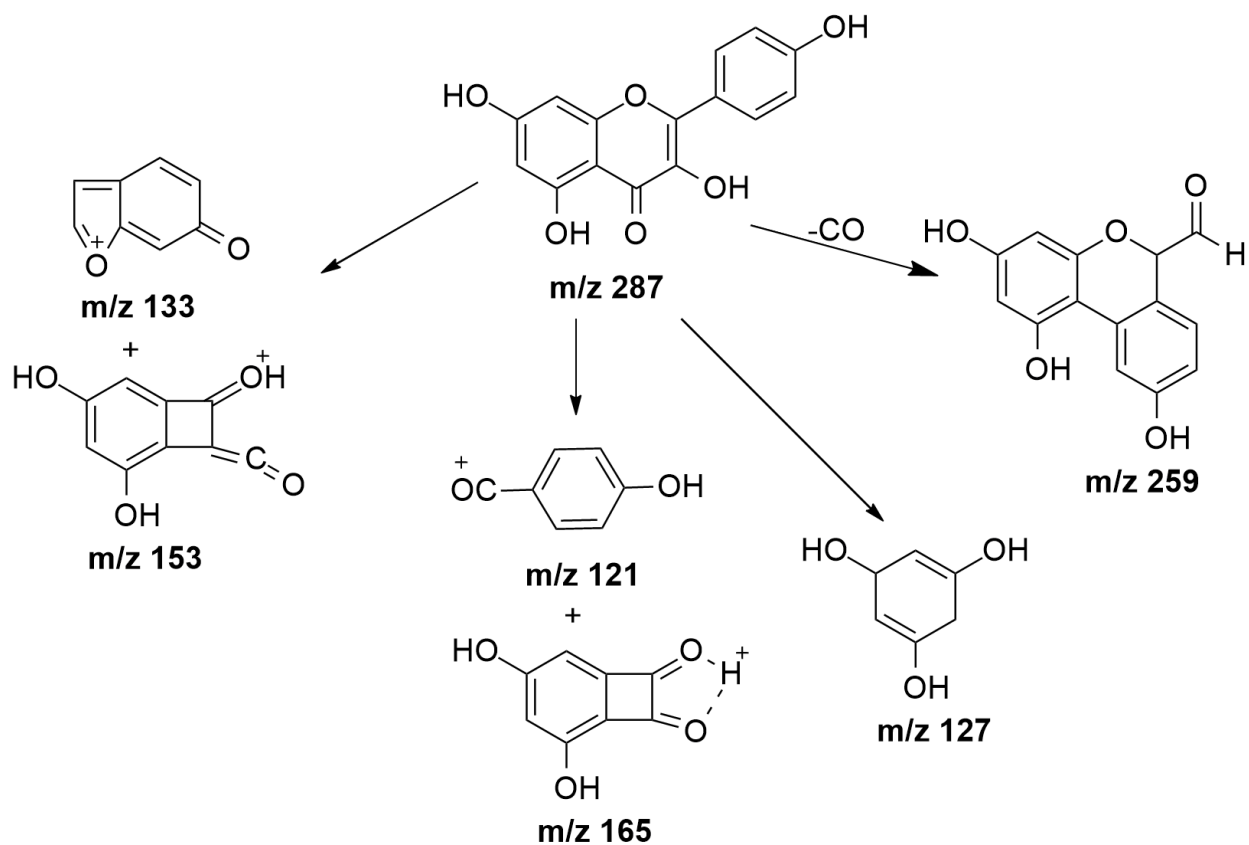

**Figure S14** Fragmentation pattern of kaempferol.

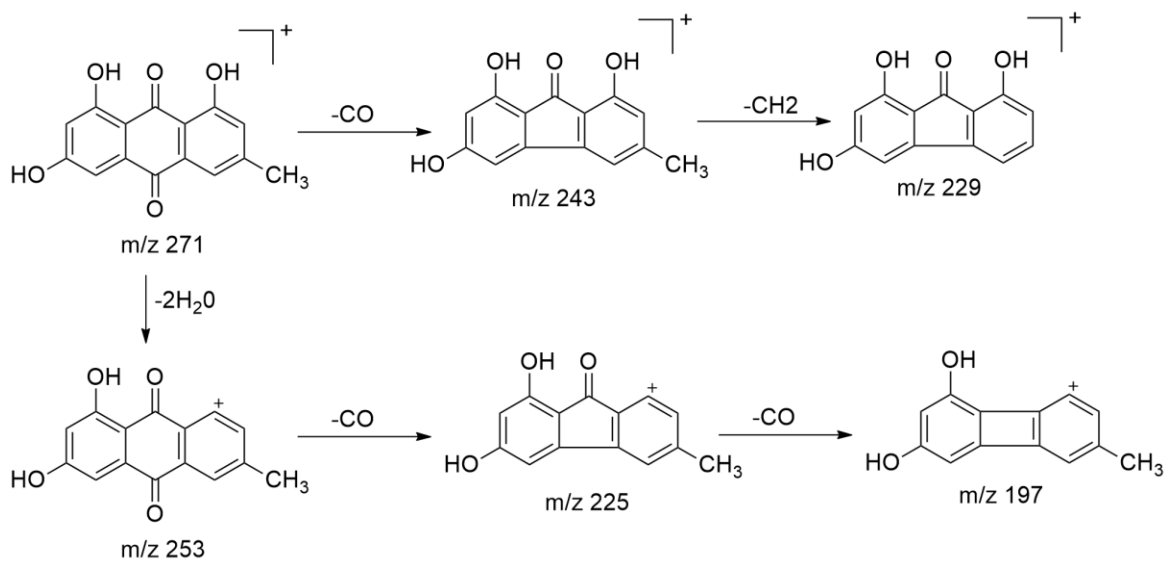

**Figure S15** Fragmentation pattern of emodin.

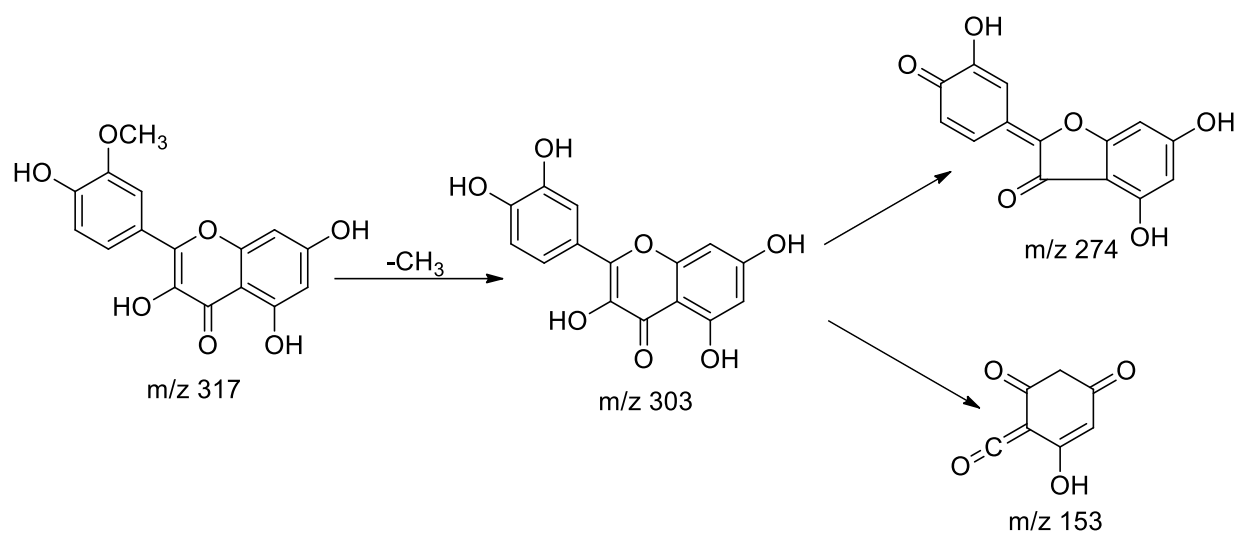

**Figure S16** Fragmentation pattern of isorhamnetin

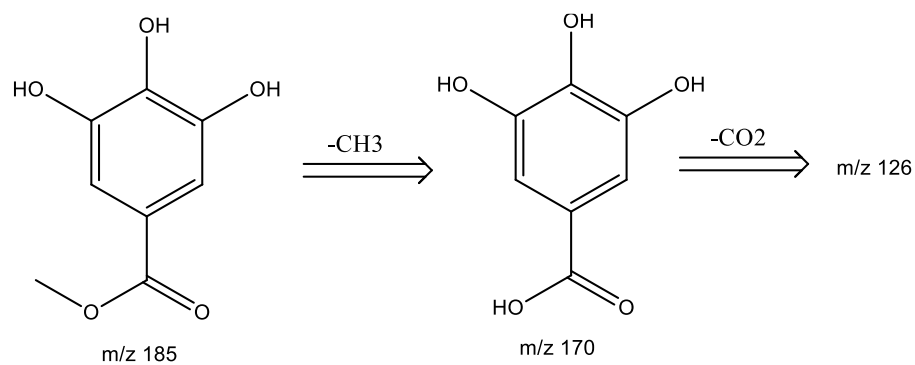

**Figure S17** Fragmentation pattern of methyl gallate
